# Supplementary material for: Danggui-Shaoyao-San (DSS) ameliorates the progression of osteoarthritis via suppressing the NF-κB signaling pathway: an in vitro and in vivo study combined with bioinformatics analysis
Source: Aging (Albany NY). 2024 Jan 8;16(1):648–64. doi: 10.18632/aging.205410 (PMC10817397; doi:10.18632/aging.205410)
Supplement: Supplementary Table 2 [file aging-16-205410-s002.xlsx]

## Sheet: Sheet1
Supplementary Table 2. Chemical components of DSS.
Component name	Formula ion	Observed RT(min)	Adducts	Neutral mass (Da)	Observed neutral mass (Da)	Observed m/z	Mass error (mDa)	Mass error (ppm)
Ginseng Trisaccharide	C18H32O16	2.12	-H	504.2	504.2	503.2	0	-0.1
Ephedra F	C30H22O10	7.58	+H	542.1	542.1	543.1	3.9	7.2
Galloylpaeoniflorin	C30H32O15	27.13	-H	632.2	632.2	631.2	0.9	1.5
Forsythiaside A	C22H26O10	25.23	-H	450.2	450.2	449.1	-0.3	-0.7
1,2,3,4,6-pentaoxo-galloyl-β-D-glucopyranose	C41H32O26	27.47	-H	940.1	940.1	939.1	-1	-1
β-gentiobiose	C12H22O11	1.51	-H	342.1	342.1	341.1	0	0.1
Arginine	C6H14N4O2	6.31	+H	174.1	174.1	175.1	1.2	6.9
Paeonoside J	C31H34O14	31.31	-H	630.2	630.2	629.2	1.6	2.5
Stachyose	C24H42O21	1.81	-H	666.2	666.2	665.2	1.8	2.8
Mueculoside E	C24H30O13	24.67	-H	526.2	526.2	525.2	0.5	1
Echinothiophene	C23H26O10S	19.87	-H	494.1	494.1	493.1	2.8	5.7
Albiflorin	C23H28O11	28.38	-H	480.2	480.2	479.2	-0.3	-0.5
Albiflorin R1	C23H28O11	25.23	-H	480.2	480.2	479.2	-0.2	-0.4
Trimeric acid	C18H34O5	32.51	-H	330.2	330.2	329.2	0.2	0.7
Benzoyl Paeoniflorin	C30H32O12	31.3	-H	584.2	584.2	583.2	1.4	2.5
Raffinose	C18H32O16	2.75	-H	504.2	504.2	503.2	0.5	1
Lininarin	C16H27NO11	8.58	+H	409.2	409.2	410.2	0.3	0.8
Geranone	C15H22O	21.15	+Na	218.2	218.2	241.2	-1.3	-5.2
Oxypaeoniflorin	C23H28O12	22.94	-H	496.2	496.2	495.2	0.2	0.4
Evodiamine	C19H17N3O	21.33	+Na	303.1	303.1	326.1	-2.2	-6.6
Guanine	C5H5N5O	30.01	+H	151	151.1	152.1	1.4	9
Hordein	C11H19NO6	13.98	+H	261.1	261.1	262.1	0.6	2.2
Belachinal	C30H46O5	33.28	-H	486.3	486.3	485.3	-0.8	-1.7
Tetravirin B	C15H20O8	25.23	-H	328.1	328.1	327.1	0.3	0.8
1,2,4,6-Tetraoxo-galloyl-β-D-glucopyranose	C34H28O22	26.22	-H	788.1	788.1	787.1	1.7	2.2
4-O-β-D-Glucopyranosyl fagomine	C12H23NO8	21.22	+Na	309.1	309.1	332.1	0.3	0.8
Elgonica-dimer A	C36H30O14	8.67	+H	686.2	686.2	687.2	4.4	6.3
Tibetan berberine new glycoside A	C25H28O11	8.65	+Na	504.2	504.2	527.2	-0.9	-1.7
Sophoramine alcohol N-oxide	C15H24N2O3	9.73	+Na	280.2	280.2	303.2	-1.2	-4.1
2′-Acetylangelin	C13H8O4	6.11	+Na	228	228	251	-0.5	-2
(+)-Eucommia Resinol-4'-glucopyranoside (Eucommendin A)	C27H34O12	8.79	+Na	550.2	550.2	573.2	-0.6	-1
Gentiana C	C10H11NO3	7.37	+H	193.1	193.1	194.1	1.2	6.2
7-Hydroxy-3′,4′-Dimethoxy-2′,5′-Diglucose isoflavone	C29H38O16	24.82	-H	642.2	642.2	641.2	2.1	3.3
Tyrosine	C9H11NO3	7.39	+H	181.1	181.1	182.1	1.4	7.9
Tubuloside A	C37H48O21	3.46	-H	828.3	828.3	827.3	7.1	8.5
Piperamide	C17H19NO5	16.85	+H	317.1	317.1	318.1	-3.2	-9.9
(Z)-(1S,5R)-β-Pin-10-enyl-β-Vetulin	C21H34O10	30.02	-H	446.2	446.2	445.2	0.1	0.3
Camphenone	C14H22O	20.81	+Na	206.2	206.2	229.2	-1.2	-5.3
Isocyanin-7-rutin	C28H34O14	24.44	-H	594.2	594.2	593.2	0.8	1.3
Artemisinin	C15H22O5	13.56	+Na	282.1	282.1	305.1	-0.8	-2.7
Dihydro-khusilol	C14H22O	19.92	+Na	206.2	206.2	229.2	-1.1	-4.9
Platycodin	C30H48O7	37.23	-H	520.3	520.3	519.3	0.3	0.5
Brucein F	C29H38O16	24.41	-H	642.2	642.2	641.2	1.8	2.8
1,2,3,6-Tetra-O-galloyl-β-D-glucose	C34H28O22	26.57	-H	788.1	788.1	787.1	2.1	2.7
12-hydroxy hydrogenated rosin acid methyl ester	C21H36O3	6.58	+H	336.3	336.3	337.3	-2.3	-6.7
Mazurin	C22H26O10	27.1	-H	450.2	450.2	449.1	-0.7	-1.6
Galloyl glucose	C13H16O10	5.26	-H	332.1	332.1	331.1	0.2	0.5
2-amino-3-(3,4-dihydroxy-phenyl)-propionic acid methyl ester	C10H13NO4	7.37	+H	211.1	211.1	212.1	1.2	5.6
Acetophenone	C14H18O10	8.68	+H	346.1	346.1	347.1	-1.9	-5.6
Borneol-2-O-β-D-celylose-(1→6)-β-D-glucoside	C21H36O10	29.49	-H	448.2	448.2	447.2	-1.1	-2.4
Gautar Aloin	C22H24O9	25.23	-H	432.1	432.1	431.1	-0.2	-0.5
1,3-O-dicaffeoylquinic acid	C25H24O12	25.02	-H	516.1	516.1	515.1	3.3	6.3
5,7-Dihydroxychromone-7-β-D-glucopyranoside	C15H16O9	8.67	+Na	340.1	340.1	363.1	0.8	2.2
23-Acetyl Alismaol L	C32H46O5	38.18	-H	510.3	510.3	509.3	0.6	1.1
Polygalaic acid	C30H48O6	33.28	-H	504.3	504.3	503.3	-1.1	-2.2
Zizipanine A	C31H42N4O4	32.47	-H	534.3	534.3	533.3	-0.7	-1.2
Methyl oleate	C19H36O2	6.68	+Na	296.3	296.3	319.3	-2.5	-7.7
2-octylphenol	C14H22O	21.53	+Na	206.2	206.2	229.2	-1.3	-5.5
Peppermint isoflavone glycosides	C36H36O17	24.45	-H	740.2	740.2	739.2	-0.3	-0.4
Oxidation-lowering phossine	C10H9NO3	19.17	+H	191.1	191.1	192.1	1.1	5.6
Rose aldehyde	C15H22O4	22.14	+Na	266.2	266.2	289.1	1.7	6.1
Phytic acid	C6H18O24P6	9.59	+H	659.9	659.9	660.9	0	-0.1
Samarcandone	C24H30O5	38.57	-H	398.2	398.2	397.2	0.1	0.2
Brocchinic acid	C16H22O10	6.54	+H	374.1	374.1	375.1	0.1	0.2
Mangiferin	C19H18O11	1.23	-H	422.1	422.1	421.1	-3.3	-7.8
L-stephenidine	C14H19NO7	21.23	+H	313.1	313.1	314.1	0.6	2
Neohecogenin-3-O-β-D-glucopyranose	C33H52O9	33.82	-H	592.4	592.4	591.4	0.1	0.2
Physalis L	C28H32O10	8.78	+H	528.2	528.2	529.2	-4.7	-8.9
Mullein sugar	C30H52O26	2.36	-H	828.3	828.3	827.3	0.9	1
Estabulin A	C15H20O4	13.59	+Na	264.1	264.1	287.1	-0.6	-2
Methyl octadecenoate	C19H36O2	6.96	+Na	296.3	296.3	319.3	-2.5	-7.7
Catechin-(4α→8)-catechin	C30H26O12	25.29	-H	578.1	578.1	577.1	-0.7	-1.2
Codonopsis	C14H21NO4	17.09	+Na	267.1	267.1	290.1	-1.1	-3.7
Tubuloside B	C31H38O16	8.64	+Na	666.2	666.2	689.2	-4.3	-6.2
Purslane amide B	C25H27NO12	21.22	+Na	533.2	533.1	556.1	-3.8	-6.8
Polycanthine	C15H19NO3	6.58	+Na	261.1	261.1	284.1	-0.6	-2.1
Trifolium	C18H24O12	7.82	+Na	432.1	432.1	455.1	-0.1	-0.1
7-O-[4′-O-(3″,4″-dihydroxycinnamyl)-β-D-glucopyranosyl]-6-methoxycoumarin	C25H24O12	27.65	-H	516.1	516.1	515.1	1.7	3.3
Citrusin-4′-O-glucopyranoside	C21H22O10	26.78	-H	434.1	434.1	433.1	0.1	0.3
Sennoside D	C42H40O19	8.68	+H	848.2	848.2	849.2	6.2	7.3
When drug glycosides (seriogenin)	C16H22O9	25.23	-H	358.1	358.1	357.1	0	0
12α-hydroxysophocarpine	C15H22N2O2	9.76	+Na	262.2	262.2	285.2	-1.2	-4.1
Psyllium	C18H32O16	10.98	+Na, +H	504.2	504.2	527.2	-0.1	-0.2
alpha-ionone	C13H20O	16.94	+Na	192.2	192.2	215.1	-0.9	-4.2
Epianhydrobelachinal	C30H44O4	34.73	-H	468.3	468.3	467.3	0.3	0.7
3-acetamido-4-hydroxybenzoic acid	C9H9NO4	14.76	+H	195.1	195.1	196.1	1.5	7.4
Matrine	C12H18N2O2	11.04	+Na	222.1	222.1	245.1	-2	-8.1
Maglifloenone (Denudatone)	C22H26O6	6.3	+H	386.2	386.2	387.2	-1.5	-3.8
PicfeltarraegeninⅦ	C30H46O7	35.69	-H	518.3	518.3	517.3	0.6	1.1
7β-(3-Ethyl-cis-crotonoyloxy)-14-hydroxynotonipetranone	C21H32O4	18.84	+H	348.2	348.2	349.2	-0.6	-1.7
Bufo tryptamine	C12H16N2O	8.49	+Na	204.1	204.1	227.1	-1.5	-6.8
Nor dwarf tea	C13H14O9	19.92	-H	314.1	314.1	313.1	1	3.2
N-Dihydrocaffeoyltyramide	C17H19NO4	8	+H	301.1	301.1	302.1	1.2	3.9
Aconitides	C15H28O13	7.92	+H, +Na	416.2	416.2	417.2	2.4	5.7
Paetocorin D	C24H30O12	28.43	-H	510.2	510.2	509.2	0.7	1.4
Epicatechin gallate (Epicatechin-3-O-gallate)	C22H18O10	26.71	-H	442.1	442.1	441.1	0.2	0.5
N-(4-Chlorobutyl) butanamide	C8H16ClNO	15.44	+H	177.1	177.1	178.1	-1.2	-6.8
3-hexen-1-ol benzoate	C13H16O2	13.61	+Na	204.1	204.1	227.1	-0.5	-2.3
Scopolin	C16H18O9	23.37	-H	354.1	354.1	353.1	0.1	0.2
Berberine	C19H15NO4	19.01	+Na	321.1	321.1	344.1	1.8	5.3
3,3′,5′-Trimethoxybibenzyl	C17H20O3	7.86	+Na	272.1	272.1	295.1	-0.9	-2.9
Neolininoside	C17H29NO11	20.57	+H	423.2	423.2	424.2	-0.5	-1.1
5-hydroxy-1,7-bisphenyl-3-heptanone	C19H22O2	10.26	+Na	282.2	282.2	305.1	-3	-10
N-methyl genistein	C12H16N2O	7.84	+Na, +H	204.1	204.1	227.1	-1.9	-8.3
N-cis-Caffeoyl Tyramine	C17H17NO4	18.4	+H	299.1	299.1	300.1	-2.9	-9.8
Dicarbazole	C24H16N2	7.04	+H	332.1	332.1	333.1	1.5	4.4
Platydesmine	C15H17NO3	22.45	+Na	259.1	259.1	282.1	-0.6	-2
Pinusin	C15H12O4	21.25	+H	256.1	256.1	257.1	2.4	9.4
Corkone	C26H30O7	21.16	+H	454.2	454.2	455.2	-1.3	-2.9
Cucurbitacin B	C32H46O8	36.74	-H	558.3	558.3	557.3	1.8	3.3
Dibutyl sebacate	C18H34O4	37.47	-H	314.2	314.2	313.2	1	3.1
1,3,6-Trigalloyl-β-D-glucose	C27H24O18	23.24	-H	636.1	636.1	635.1	3	4.7
sucrose	C12H22O11	22.78	-H	342.1	342.1	341.1	-0.4	-1.2
Nelumboroside B	C33H40O20	24.43	-H	756.2	756.2	755.2	-0.2	-0.3
Limonin	C26H30O8	21.21	+Na	470.2	470.2	493.2	-3	-6
16-Carbonyl Alismaol A	C30H48O6	34.06	-H	504.3	504.3	503.3	-0.8	-1.5
Scopolamine (Hyoscine)	C17H21NO4	6.85	+H	303.1	303.1	304.2	2.3	7.6
Baohuoside I	C27H30O10	35.35	-H	514.2	514.2	513.2	1	1.9
Euphormisin M3	C27H24O18	23.91	-H	636.1	636.1	635.1	2.4	3.8
Picroside Ⅱ	C23H28O13	23.37	-H	512.2	512.2	511.1	0.7	1.4
4-caffeoyloxyquinic acid	C16H18O9	27.99	-H	354.1	354.1	353.1	-0.1	-0.3
Xanthium thiazide diketoside	C17H23NO8S	21.22	+Na	401.1	401.1	424.1	-0.6	-1.5
Syringic acid glucoside	C15H20O10	6.79	+Na	360.1	360.1	383.1	-2.1	-5.5
Cnidimol F	C15H14O6	23.05	-H	290.1	290.1	289.1	1.7	5.9
Kadsurenin C	C21H26O5	9.92	+Na	358.2	358.2	381.2	-2.6	-6.9
Mijudin	C17H15NO5	18.82	+H	313.1	313.1	314.1	1.9	6.2
Bufonate (Bufo quaternary amine)	C13H18N2O+	15.44	+Na	218.1	218.1	241.1	-1.1	-4.5
Matrine A	C28H24N4O2	16.78	+H	448.2	448.2	449.2	4	8.9
Spongein B	C19H20O3	16.85	+Na	296.1	296.1	319.1	1.5	4.8
Atroposide A	C33H54O8	39.88	-H	578.4	578.4	577.4	1.1	1.9
Adenosine	C10H13N5O4	18.84	+Na	267.1	267.1	290.1	1.4	4.9
(3α,4β,5α)-4,5-dihydro-(1-pyrrolyl)-4,5-dimethyl-2(3H)-furanone	C10H13NO2	7.84	+Na	179.1	179.1	202.1	-1.4	-6.8
Phellodendron A	C17H20O9	25.28	-H	368.1	368.1	367.1	0.1	0.2
N-methylanthranilic acid	C8H9NO2	21.21	+H	151.1	151.1	152.1	0.8	5.6
1-O-β-D-Glucopyranosylpaeonisuffrone	C16H24O9	12.51	-H	360.1	360.1	359.1	0.8	2.2
Viburnum flavonol glycosides A	C30H26O13	21.39	+H	594.1	594.1	595.1	3.8	6.4
2,3-(S)-Hexahydroxydiphenoyl-D-glucose	C20H18O14	2.62	-H	482.1	482.1	481.1	1	2.2
Bletilol B	C27H26O7	6.31	+Na	462.2	462.2	485.2	-2.7	-5.6
cis-3′,4′-Diisovaleryl khellactone	C26H30O5	21.22	+Na	422.2	422.2	445.2	-4.3	-9.6
Bitterwood lactone	C25H34O8	8.78	+Na	462.2	462.2	485.2	-2.4	-5
N,N-Dimethyl-L-tryptophan	C13H16N2O2	7.89	+H	232.1	232.1	233.1	-1.8	-7.5
Curcumone	C15H18O3	13.6	+Na	246.1	246.1	269.1	-0.6	-2.1
Chlorogenic acid	C16H18O9	21.23	-H	354.1	354.1	353.1	0.5	1.3
Arecoline	C7H11NO2	7.21	+H	141.1	141.1	142.1	1.3	8.9
13,17-Epoxy Alismaol A	C30H50O6	39.77	-H	506.4	506.4	505.4	0.5	1
Salvia miltiorrhiza	C21H20O4	21.36	+H	336.1	336.1	337.1	-3	-8.8
North cohosh	C30H48O5	36.16	-H	488.4	488.3	487.3	-1.5	-3
3-Dimethylallyl-4-methoxy-2-quinolone	C15H17NO2	6.58	+Na	243.1	243.1	266.1	-2.2	-8.4
Ephedra K	C30H20O11	6.44	+H, +Na	556.1	556.1	557.1	4.4	7.8
Tanyun food essence	C27H22O18	21.62	-H	634.1	634.1	633.1	2.4	3.9
Luteolin	C15H22N2O2	11.77	+Na	262.2	262.2	285.2	-1.7	-6
Pantothenic acid	C11H21NO5	21.88	+H	247.1	247.1	248.1	0.2	0.9
Benzyl alcohol xylopyranoside (1→6) glucopyranoside	C18H26O10	23.69	-H	402.2	402.2	401.1	0.3	0.7
Pomegranate	C8H13N	12.8	+Na	123.1	123.1	146.1	-0.5	-3.2
Benzyl-O-β-D-glucopyranoside	C13H18O5	7.28	+Na	254.1	254.1	277.1	-1.7	-6.3
Acacia quinone E	C21H24O9	7.27	+H	420.1	420.1	421.1	-3.3	-7.8
Cimicifuga Glycoside	C22H28O11	6.32	+H	468.2	468.2	469.2	3.3	7
Methyl kushenol C	C26H28O7	21.24	+Na, +H	452.2	452.2	475.2	-3.9	-8.2
Thymidine	C10H14N2O5	6.77	+Na	242.1	242.1	265.1	-2.2	-8.5
Ellagic acid (inverse gallic acid)	C14H6O8	16.88	+H	302	302	303	0.3	0.9
Vitamin B12	C63H88CoN14O14P	6.29	+Na	1354.6	1354.6	1377.6	0.4	0.3
Asterone glycoside B	C22H38O10	30.54	-H	462.2	462.2	461.2	0.5	1.1
6-aldehyde iso-Ophiopogon flavone A	C19H14O7	25.02	-H	354.1	354.1	353.1	2.2	6.1
Kadsurenin A	C22H24O6	18.64	+Na	384.2	384.2	407.1	-3.7	-9.2
Ethyl 5-ethoxy-2-hydroxybenzoate	C11H14O4	21.22	+H	210.1	210.1	211.1	0.1	0.5
5-phenyl-2,4-pentadienoic acid	C11H10O2	20.04	+Na	174.1	174.1	197.1	-0.7	-3.8
Oxolatine-7-O-β-D-glucoside	C22H24O9	31.3	-H	432.1	432.1	431.1	0.7	1.5
D-pseudoephedrine	C10H15NO	9.69	+Na	165.1	165.1	188.1	-1.9	-9.9
P-hydroxybenzylmalic acid	C11H12O6	8.69	+H	240.1	240.1	241.1	2	8.3
7,8-Dimethoxyplatydesmine	C17H21NO5	11.21	+H	319.1	319.1	320.1	-2.3	-7.2
Deacetylated milrinic acid	C26H34O9	14.62	+Na	490.2	490.2	513.2	-4.5	-8.8
Artemisinin	C15H22O5	15.57	+Na	282.1	282.1	305.1	-0.7	-2.2
Gardenin E	C19H18O9	6.54	+Na	390.1	390.1	413.1	-0.7	-1.8
Papaverine	C23H27NO8	19.55	+H	445.2	445.2	446.2	-3.7	-8.2
9α-hydroxysophocarpine	C15H22N2O2	10.33	+Na	262.2	262.2	285.2	-1.7	-6.1
Avocadoline	C11H15NO2	21.15	+Na	193.1	193.1	216.1	-1.2	-5.3
2-Anilino-1,4-naphthoquinone	C16H11NO2	9.95	+Na	249.1	249.1	272.1	-2.3	-8.5
Icariin B4	C19H32O8	21.9	+H	388.2	388.2	389.2	-2.4	-6.2
Cimicifugaoside	C32H48O9	32.97	-H	576.3	576.3	575.3	0.7	1.1
Douglas fir-3-O-β-D-glucopyranoside	C21H22O12	8.69	+Na	466.1	466.1	489.1	0.6	1.2
6'-O-Benzoyl-4``-hydroxy-3''-methoxypaeoniflorin	C31H34O14	30.77	-H	630.2	630.2	629.2	2.5	4
Astragalus F	C12H18N2O5	22.1	+H	270.1	270.1	271.1	1.3	4.8
Ellagic acid-4-O-β-D-glucopyranoside	C23H22O13	6.3	+H	506.1	506.1	507.1	3.7	7.2
Piperolactam-C5:1(2E)	C16H19NO3	21.15	+H	273.1	273.1	274.1	-0.5	-1.8
Dendrobium nobile C	C15H22O6	11.69	+Na	298.1	298.1	321.1	0.9	2.9
Dendrobium officinale D	C17H20O5	20.59	+H	304.1	304.1	305.1	2.2	7.3
Gypenoside ⅩⅦ	C48H82O18	6.3	+Na	946.6	946.5	969.5	-1.2	-1.2
Pteridium R	C15H19ClO2	21.21	+Na	266.1	266.1	289.1	2.6	8.9
Cordycepin	C10H13N5O3	7.39	+Na	251.1	251.1	274.1	0	0
Sophora flavescens color full of dihydroflavonoids D	C25H28O5	11.69	+Na	408.2	408.2	431.2	3.7	8.6
Inoside	C15H16O8	22.39	-H	324.1	324.1	323.1	0.6	2
7β-(3-Ethyl-cis-crotonoyloxy)-1α-(2-methyl-butyryloxy)-3,14-dehydro-Z-notonipetranone	C26H38O5	33.8	-H	430.3	430.3	429.3	-0.3	-0.6
Tianshi Acid	C18H34O5	33.97	-H	330.2	330.2	329.2	0.3	0.9
Nicotine	C10H14N2	33.29	-H	162.1	162.1	161.1	0.6	3.8
Dendromoniliside E	C28H38O14	30.88	-H	598.2	598.2	597.2	1.9	3.3
Ephedrine B	C29H38N4O5	30.32	-H	522.3	522.3	521.3	-1.3	-2.6
Clearance aglycone	C26H40O6	32.47	-H	448.3	448.3	447.3	0	0.1
P-O-Glucosyl Trans-Cinnamic Acid Methyl Ester	C16H20O8	25.24	-H	340.1	340.1	339.1	0.8	2.5
Pokeweed sapogenin	C31H48O7	34.7	-H	532.3	532.3	531.3	-0.1	-0.2
Benzoyloxypaeoniflorin	C30H32O13	29.82	-H	600.2	600.2	599.2	1.6	2.7
Prosapogenin 2	C32H48O8	37.06	-H	560.3	560.3	559.3	1.4	2.5
2,6-Di-O-galloyl-β-D-glucose	C20H20O14	23.39	-H	484.1	484.1	483.1	1.2	2.4
2,6-Bis(4-hydroxybenzyl)-3′,5-dimethoxy-3-hydroxybibenzyl	C30H30O5	28.88	-H	470.2	470.2	469.2	-3.8	-8
6-O-β-D-Glucopyranosyllactinolide_1	C16H26O9	24.11	-H	362.2	362.2	361.2	0.1	0.3
Cassia lactone	C15H12O5	26.78	-H	272.1	272.1	271.1	2.4	8.7
1-Acetyl-3-(methoxy-carbonyl)-β-carboline	C15H12N2O3	9.83	-H	268.1	268.1	267.1	-1.1	-4.1
Aster Saponins Ha	C42H66O14	36.7	-H	794.4	794.4	793.4	3.6	4.5
Poria New Acid DM	C32H48O6	34.73	-H	528.3	528.3	527.3	0.7	1.3
4′,5,7-trihydroxy-3,6-dimethoxyflavonoid-7-O-β-D-glucopyranoside	C23H24O12	27.15	-H	492.1	492.1	491.1	-1	-2
Bamboo ginsenoside IV	C47H74O18	35.47	-H	926.5	926.5	925.5	1.7	1.8
Oxybenzoylpaeoniflorin	C30H32O13	29.37	-H	600.2	600.2	599.2	2.3	3.9
Formononetin	C22H22O9	29.83	-H	430.1	430.1	429.1	0.1	0.2
Ephedra Tannin A	C20H20O14	22.76	-H	484.1	484.1	483.1	0.8	1.6
1-Acetyl-β-Carboline	C13H10N2O	1.48	-H	210.1	210.1	209.1	1.1	5.2
Isoflavin	C20H24O9	30.32	-H	408.1	408.1	407.1	0.5	1.1
Paeoniflorin	C23H26O10	25.23	-H	462.2	462.2	461.1	0.6	1.4
2-Hydroxy pokeweed acid	C30H46O7	33.95	-H	518.3	518.3	517.3	0.9	1.6
6-O-Benzoyl Gomixin O	C30H32O8	24.5	-H	520.2	520.2	519.2	5	9.6
Protodiosgenin	C33H54O9	36.98	-H	594.4	594.4	593.4	2	3.3
Sauroside B	C32H38O14	30.11	-H	646.2	646.2	645.2	2.3	3.6
Daylily Lignans A	C20H18O8	31.66	-H	386.1	386.1	385.1	0.4	1
28-Deacetylbelamcandal	C30H46O5	34.72	-H	486.3	486.3	485.3	0.2	0.4
Ganoderma acid ε	C30H44O7	33.7	-H	516.3	516.3	515.3	0.7	1.4
Luteolin-7-O-β-D-Neohesperidin	C27H30O15	25.23	-H	594.2	594.2	593.2	2.8	4.6
Lindenin	C30H26O13	22.94	-H	594.1	594.1	593.1	0	0
6-Hydroxykaempferol-3-O-glucoside	C21H20O12	26.91	-H	464.1	464.1	463.1	0.8	1.8
Asterone glycoside A	C21H36O10	21.9	-H	448.2	448.2	447.2	0.2	0.5
1,3,6-Trihydroxy-2-methylanthraquinone-3-O-(O-6-acetyl) neohesperidin	C29H32O15	31.3	-H	620.2	620.2	619.2	-5	-8.2
1,6-Digalloyl-β-D-glucopyranoside	C20H20O14	22.4	-H	484.1	484.1	483.1	0.6	1.3
S	C30H28N4O4	25.05	-H	508.2	508.2	507.2	2.4	4.7
Neorutinin	C17H22N2O10S2	26.59	-H	478.1	478.1	477.1	3.9	8.1
